# Supplementary material for: Racial and Sex Disparities in Gout Prevalence Among US Adults
Source: PubMed Central journal article supplement (PMC9379746; doi:10.1001/jamanetworkopen.2022.26804), 2022-08-15
Supplement: jamanetwopen-e2226804-s001.pdf [file jamanetwopen-e2226804-s001.pdf]

## Supplementary Online Content

McCormick N, Lu N, Yokose C, et al. Racial and sex disparities in gout prevalence among US adults. *JAMA Netw Open*. 2022;5(8):e2226804.  
doi:10.1001/jamanetworkopen.2022.26804

**eTable 1.** Participant Characteristics by Sex and Race (Complete Case Analysis)

**eTable 2.** Sex-Specific Association Between Black Race and Gout and Hyperuricemia, 2007-2008 to 2015-2016 NHANES (Complete Case Analysis)

**eTable 3.** Association of Risk Factors With Gout and Hyperuricemia Among Women

**eTable 4.** Association of Risk Factors With Gout and Hyperuricemia Among Men

**eFigure.** Age-Adjusted Prevalence of Gout Among Black and White US Adults Between NHANES III (1988-1994) and NHANES 2006-2017

This supplementary material has been provided by the authors to give readers additional information about their work.

**eTable 1. Participant Characteristics by Sex and Race (complete case analysis)**

|                                                                          | WOMEN                      |                              | MEN                          |                              |
|--------------------------------------------------------------------------|----------------------------|------------------------------|------------------------------|------------------------------|
|                                                                          | Black (n=2,158)            | White (n=4,764)              | Black (n=2,037)              | White (n=4,810)              |
| Age, mean (SD)                                                           | 44.8 (0.5)                 | 49.9 (0.4)                   | 44.1 (0.5)                   | 48.7 (0.3)                   |
| Education: high school or less, N/% (95% CI) <sup>a</sup>                | 948/41.5% (38.6% to 44.3%) | 1,834/31.7% (28.9% to 34.5%) | 1,095/51.6% (48.8% to 54.4%) | 1,989/34.0% (30.6% to 37.4%) |
| Poverty: family income-to-poverty-ratio < 1.3, N/% (95% CI) <sup>a</sup> | 796/36.7% (33.4% to 40.0%) | 1,312/16.6% (14.6% to 18.7%) | 626/30.9% (28.1% to 33.8%)   | 1,234/14.1% (12.2% to 16.0%) |
| BMI, mean (SD)                                                           | 32.3 (0.2)                 | 28.8 (0.1)                   | 29.2 (0.1)                   | 28.9 (0.1)                   |
| No. drinks per week, mean (SD)                                           | 2.0 (0.2)                  | 2.5 (0.1)                    | 5.1 (0.2)                    | 5.6 (0.2)                    |
| DASH score, mean (SD) <sup>b</sup>                                       | 28.9 (0.1)                 | 25.3 (0.1)                   | 30.3 (0.2)                   | 27.4 (0.1)                   |
| Diuretic use, N/% (95% CI) <sup>a</sup>                                  | 274/10.9% (9.6% to 12.2%)  | 470/8.1% (7.1% to 9.0%)      | 200/6.9% (5.8% to 8.0%)      | 419/6.2% (5.5% to 7.0%)      |
| CKD: eGFR <60 mL/min, N/% (95% CI) <sup>a</sup>                          | 267/9.6% (8.2% to 11.0%)   | 484/7.1% (6.4% to 7.9%)      | 221/7.2% (6.3% to 8.2%)      | 383/4.7% (4.0% to 5.4%)      |

BMI=body mass index; CKD=chronic kidney disease; DASH=Dietary Approaches to Stop Hypertension; eGFR=estimated glomerular filtration rate; SD=standard deviation; 95% CI=95% confidence interval for the weighted frequencies

<sup>a</sup>The N refers to the unweighted number of individuals included in the sample, whilst the % is the weighted frequency of the risk factor in the corresponding stratum of the US population.

<sup>b</sup>All factors were scored such that their presence (or higher values) corresponded to a greater risk of gout or hyperuricemia. Therefore, the continuous DASH score was inverted such that higher scores indicate lower levels of adherence to a DASH-style diet.

**eTable 2. Sex-Specific Association Between Black Race and Gout and Hyperuricemia, 2007-2008 to 2015-2016 NHANES (Complete Case Analysis)**

|              | <b>GOUT</b>                                    |                                             | <b>HYPERURICEMIA</b>                           |                                             |
|--------------|------------------------------------------------|---------------------------------------------|------------------------------------------------|---------------------------------------------|
|              | <b>Age Adjusted<br/>Prevalence, % (95% CI)</b> | <b>Age Adjusted Odds<br/>Ratio (95% CI)</b> | <b>Age Adjusted<br/>Prevalence, % (95% CI)</b> | <b>Age Adjusted Odds<br/>Ratio (95% CI)</b> |
| <b>Women</b> |                                                |                                             |                                                |                                             |
| Black        | 3.4 (2.4 to 4.3)                               | 1.60 (1.05 to 2.44)                         | 10.2 (8.8 to 11.6)                             | 1.98 (1.58 to 2.49)                         |
| White        | 2.1 (1.5 to 2.7)                               | 1 [Reference]                               | 5.6 (4.8 to 6.3)                               | 1 [Reference]                               |
| <b>Men</b>   |                                                |                                             |                                                |                                             |
| Black        | 7.2 (6.1 to 8.3)                               | 1.28 (1.01 to 1.62)                         | 11.0 (9.7 to 12.3)                             | 1.42 (1.14 to 1.76)                         |
| White        | 5.6 (4.8 to 6.4)                               | 1 [Reference]                               | 7.8 (6.7 to 8.6)                               | 1 [Reference]                               |

95% CI=95% confidence interval

**eTable 3. Association of Risk Factors With Gout and Hyperuricemia Among Women**

| Risk Factor                                      | Exposure (Race)-Risk Factor Associations              |                        |                                                                | Risk Factor-Outcome Associations*           |                        | Excess Odds Explained (%) |               |
|--------------------------------------------------|-------------------------------------------------------|------------------------|----------------------------------------------------------------|---------------------------------------------|------------------------|---------------------------|---------------|
|                                                  | Age-Adjusted Least-Squares Mean (95% CI) <sup>a</sup> |                        | Age-Adjusted Difference Between Black and White Women (95% CI) | Adjusted Odds Ratio (95% CI) <sup>b,c</sup> |                        | Gout                      | Hyperuricemia |
|                                                  | Black Women                                           | White Women            |                                                                | Gout                                        | Hyperuricemia          |                           |               |
| Education: high school or less, %                | 45.1<br>(43.0 to 47.1)                                | 38.0<br>(36.6 to 39.3) | 7.1<br>(4.6 to 9.6)                                            | 1.24<br>(0.94 to 1.63)                      | 1.38<br>(1.16 to 1.64) | 5%                        | 4%            |
| Poverty: family income-to-poverty-ratio < 1.3, % | 36.2<br>(34.3 to 38.1)                                | 27.8<br>(26.5 to 29.1) | 8.4<br>(6.0 to 10.7)                                           | 2.36<br>(1.79 to 3.10)                      | 1.71<br>(1.44 to 2.05) | 26%                       | 8%            |
| No. drinks per week                              | 1.9<br>(1.7 to 2.1)                                   | 2.4<br>(2.2 to 2.5)    | -0.5<br>(-0.8 to -0.2)                                         | 1.11<br>(1.01 to 1.22)                      | 1.07<br>(1.00 to 1.15) | -3%                       | -1%           |
| DASH score (inverted)                            | 28.4<br>(28.2 to 28.6)                                | 25.6<br>(25.4 to 25.7) | 2.9<br>(2.6 to 3.1)                                            | 1.20<br>(1.04 to 1.40)                      | 1.26<br>(1.15 to 1.39) | 25%                       | 19%           |
| BMI, kg/m <sup>2</sup>                           | 32.2<br>(31.9 to 32.5)                                | 29.0<br>(28.7 to 29.2) | 3.2<br>(2.9 to 3.6)                                            | 1.68<br>(1.49 to 1.89)                      | 1.97<br>(1.81 to 2.13) | 53%                       | 37%           |
| Diuretic use, %                                  | 13.9<br>(12.6 to 15.1)                                | 9.3<br>(8.5 to 10.2)   | 4.5<br>(3.0 to 6.1)                                            | 2.17<br>(1.59 to 2.95)                      | 4.11<br>(3.38 to 5.00) | 14%                       | 13%           |
| CKD: eGFR <60 mL/min, %                          | 14.2<br>(13.0 to 15.4)                                | 9.3<br>(8.5 to 10.2)   | 4.8<br>(3.4 to 6.3)                                            | 1.71<br>(1.23 to 2.38)                      | 6.40<br>(5.15 to 7.94) | 14%                       | 23%           |

<sup>a</sup>For dichotomous variables (Education, Poverty, Diuretic Use, and CKD), the data have been scored 0 for “no” and 1 for “yes”; therefore, the mean is equivalent to the proportion.

<sup>b</sup>Adjusted for age and race; <sup>c</sup>Difference in a dichotomous factor or 1 SD difference in a continuous factor.

BMI=body mass index; CKD=chronic kidney disease; DASH=Dietary Approaches to Stop Hypertension; eGFR=estimated glomerular filtration rate; SD=standard deviation

\*Estimates for each risk factor generated from sample of women with complete data on Gout status, risk factor of interest, and all other factors. Risk Factor-Outcome Associations adjusted for age and self-reported race.

**eTable 4. Association of Risk Factors With Gout and Hyperuricemia Among Men**

| Risk Factor                                      | Exposure (Race)-Risk Factor Associations              |                        |                                                              | Risk Factor-Outcome Associations*           |                        | Excess Odds Explained (%) |               |
|--------------------------------------------------|-------------------------------------------------------|------------------------|--------------------------------------------------------------|---------------------------------------------|------------------------|---------------------------|---------------|
|                                                  | Age-Adjusted Least-Squares Mean (95% CI) <sup>a</sup> |                        | Age-Adjusted Difference Between Black and White men (95% CI) | Adjusted Odds Ratio (95% CI) <sup>b,c</sup> |                        | Gout                      | Hyperuricemia |
|                                                  | Black men                                             | White men              |                                                              | Gout                                        | Hyperuricemia          |                           |               |
| Education: high school or less, %                | 54.1<br>(52.0 to 56.3)                                | 41.2<br>(39.8 to 42.6) | 12.9<br>(10.3 to 15.5)                                       | 1.12<br>(0.93 to 1.34)                      | 0.97<br>(0.83 to 1.14) | 7%                        | -1%           |
| Poverty: family income-to-poverty-ratio < 1.3, % | 30.1<br>(28.2 to 32.0)                                | 25.9<br>(24.7 to 27.1) | 4.3<br>(2.0 to 6.5)                                          | 1.14<br>(0.93 to 1.40)                      | 1.15<br>(0.96 to 1.37) | 3%                        | 2%            |
| No. drinks per week                              | 4.9<br>(4.5 to 5.3)                                   | 5.4<br>(5.1 to 5.6)    | -0.5<br>(-1.0 to 0.0)                                        | 1.17<br>(1.08 to 1.26)                      | 1.14<br>(1.07 to 1.22) | -2%                       | -1%           |
| DASH score (inverted)                            | 29.8<br>(29.6 to 30.0)                                | 27.6<br>(27.5 to 27.7) | 2.3<br>(2.1 to 2.5)                                          | 1.14<br>(1.03 to 1.25)                      | 1.12<br>(1.03 to 1.22) | 23%                       | 14%           |
| BMI, kg/m <sup>2</sup>                           | 29.2<br>(28.9 to 29.5)                                | 28.8<br>(28.6 to 29.0) | 0.4<br>(0.1 to 0.7)                                          | 1.53<br>(1.40 to 1.66)                      | 1.68<br>(1.56 to 1.80) | 8%                        | 12%           |
| Diuretic use, %                                  | 10.8<br>(9.6 to 12.0)                                 | 8.3<br>(7.5 to 9.1)    | 2.5<br>(1.1 to 3.9)                                          | 2.02<br>(1.61 to 2.54)                      | 4.39<br>(3.53 to 5.47) | 10%                       | 14%           |
| CKD: eGFR <60 mL/min, %                          | 12.0<br>(10.9 to 13.2)                                | 7.5<br>(6.7 to 8.2)    | 4.6<br>(3.2 to 6.0)                                          | 2.23<br>(1.77 to 2.81)                      | 3.96<br>(3.14 to 5.00) | 27%                       | 25%           |

<sup>a</sup>For dichotomous variables (Education, Poverty, Diuretic Use, and CKD), the data have been scored 0 for “no” and 1 for “yes”; therefore, the mean is equivalent to the proportion.

<sup>b</sup>Adjusted for age and race; <sup>c</sup>Difference in a dichotomous factor or 1 SD difference in a continuous factor.

BMI=body mass index; CKD=chronic kidney disease; DASH=Dietary Approaches to Stop Hypertension; eGFR=estimated glomerular filtration rate; SD=standard deviation

\*Estimates for each risk factor generated from sample of men with complete data on Gout status, risk factor of interest, and all other factors. Risk Factor-Outcome Associations adjusted for age and self-reported race.

**eFigure. Age-Adjusted Prevalence of Gout Among Black and White US Adults Between NHANES III (1988-1994) and NHANES 2006-2017**

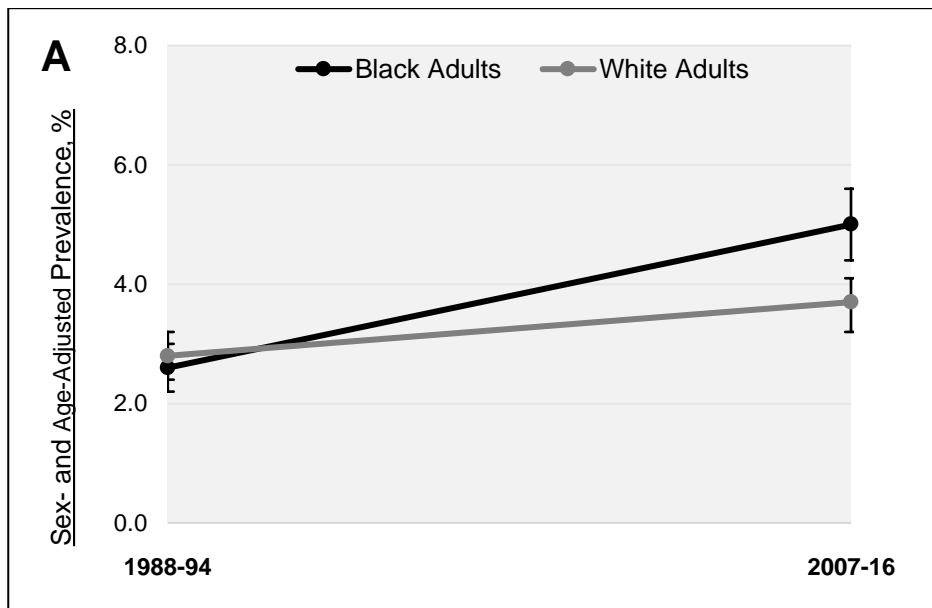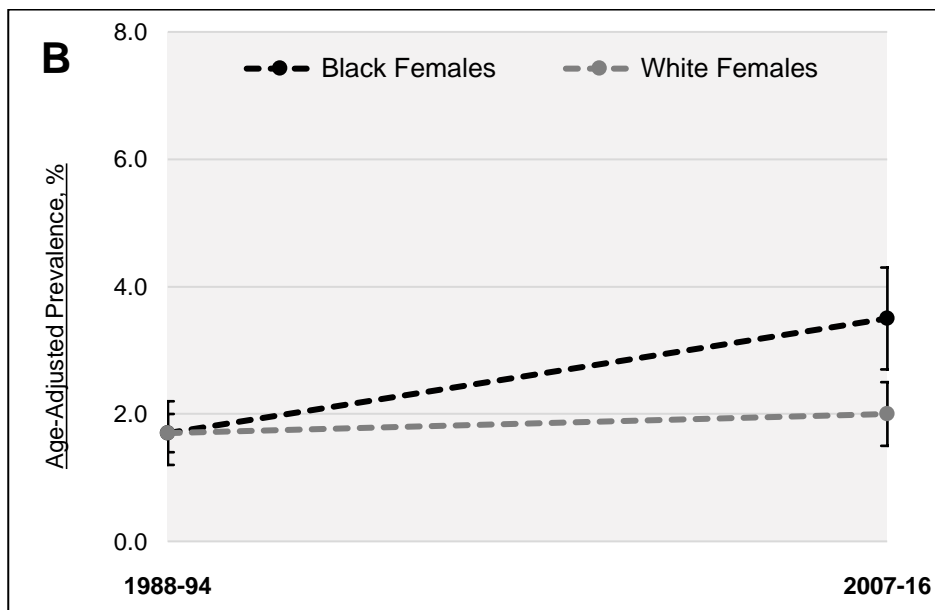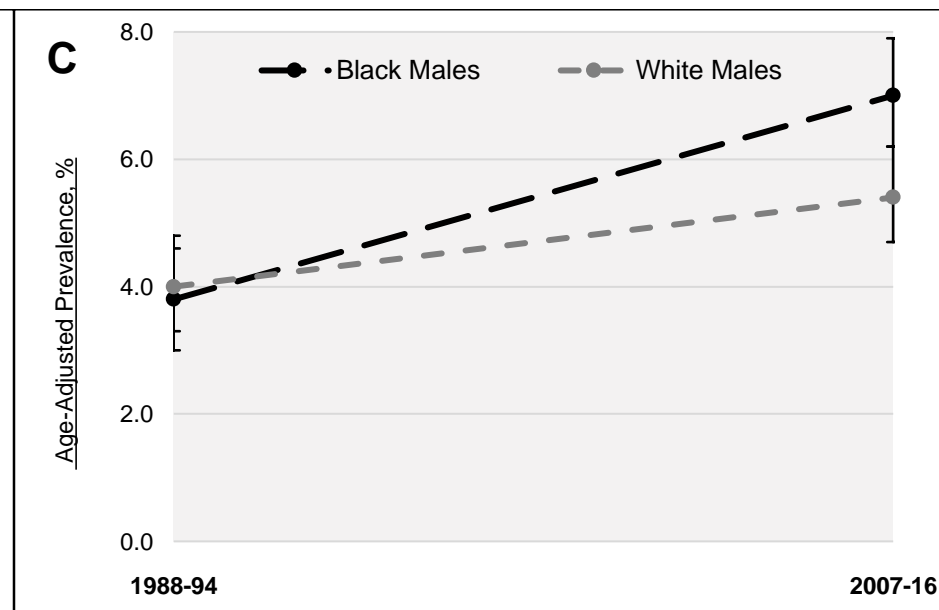

**(A) Black and White adults overall; (B) Black and White women; (C) Black and White men.**
